# Supplementary material
Source: PubMed Central journal article supplement (PMC6251543)
Supplement: ehx284_Supp.pdf [file ehx284_Supp.pdf]

## **Title: Big Data in cardiology**

### **References:**

1. Andreu-Perez J, Poon CCY, Merrifield RD, Wong STC, Yang GZ. Big Data for Health. *IEEE Journal of Biomedical and Health Informatics*. 2015 July; 19(4): 1193-1208.
2. Rumsfeld JS, Joynt KE, Maddox TM. Big Data Analytics To Improve Cardiovascular Care: Promise and Challenges. *Nature Reviews Cardiology*. 2016 Jun;13(6):350-359.
3. Allen LA, Matlock DD, Shetterly SM, Xu S, Levy WC, Portalupi LB, McIlvennan CK, Gurwitz JH, Johnson ES, Smith DH, Magid DJ. Use of Risk Models to Predict Death in the Next Year Among Individual Ambulatory Patients With Heart Failure. *JAMA Cardiol*. 2017;2(4):435-441.
4. Ackerman JP, Bartos DC, Kapplinger JD, Tester DJ, Delisle BP, Ackerman MJ. The Promise and Peril of Precision Medicine: Phenotyping Still Matters Most. *Mayo Clin Proc*. 2016;91(11):1606-1616.
